# Supplementary material
Source: HighWire-hosted journal article supplement (https://www.g3journal.org/content/suppl/2013/03/06/g3.113.005637)
Supplement: FigureS5.pdf [file FigureS5.pdf]

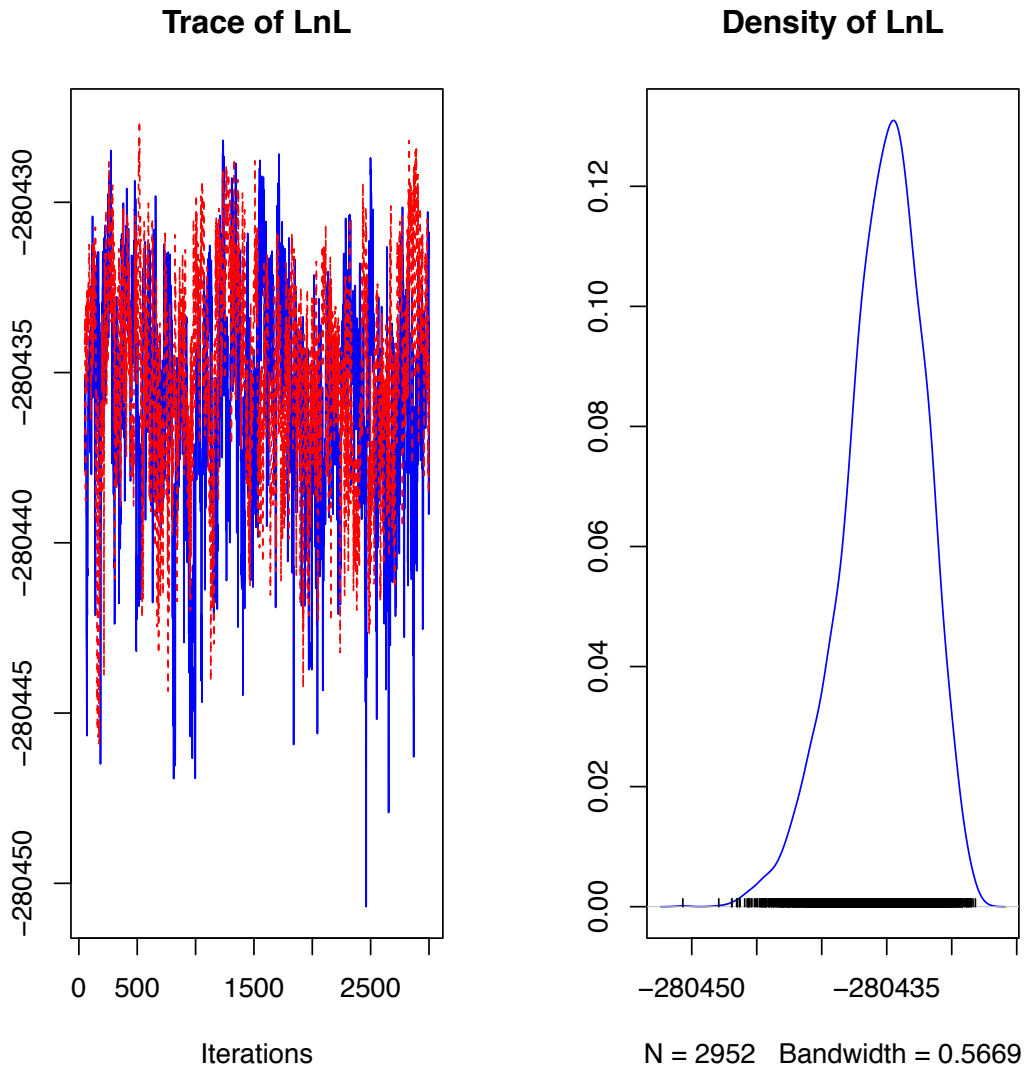

**Figure S5** Trace and density plots of the posterior probability of the phylogenetic analysis. After thinning the samples of the posterior probability, we obtained 2952 draws from the posterior. Shown in (A) is the negative log-likelihood trace plot. In (B) we plot the density of the thinned posterior.
