# Supplementary material
Source: HighWire-hosted journal article supplement (https://www.g3journal.org/content/suppl/2013/03/06/g3.113.005637)
Supplement: FigureS8.pdf [file FigureS8.pdf]

## Biological Process

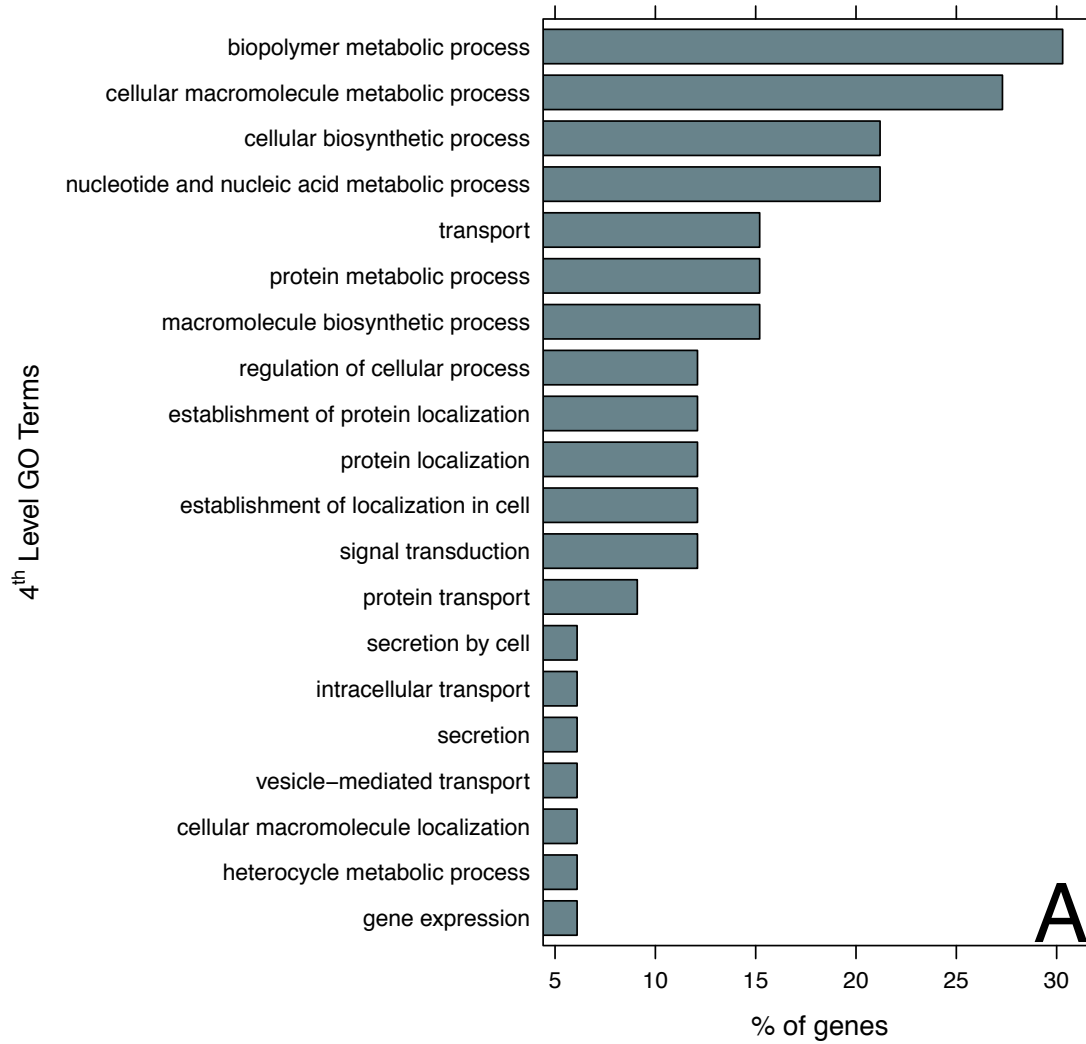

## Cellular Component

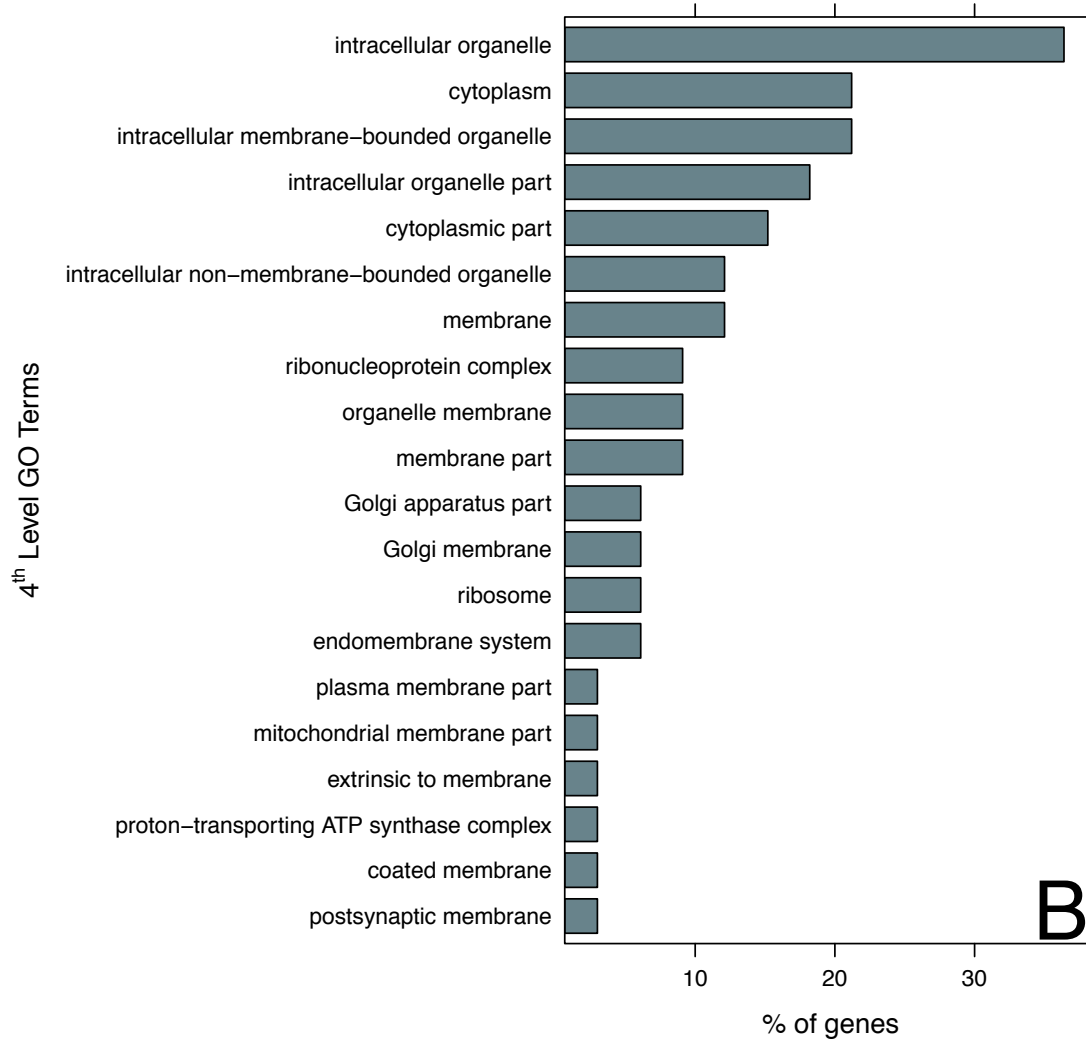

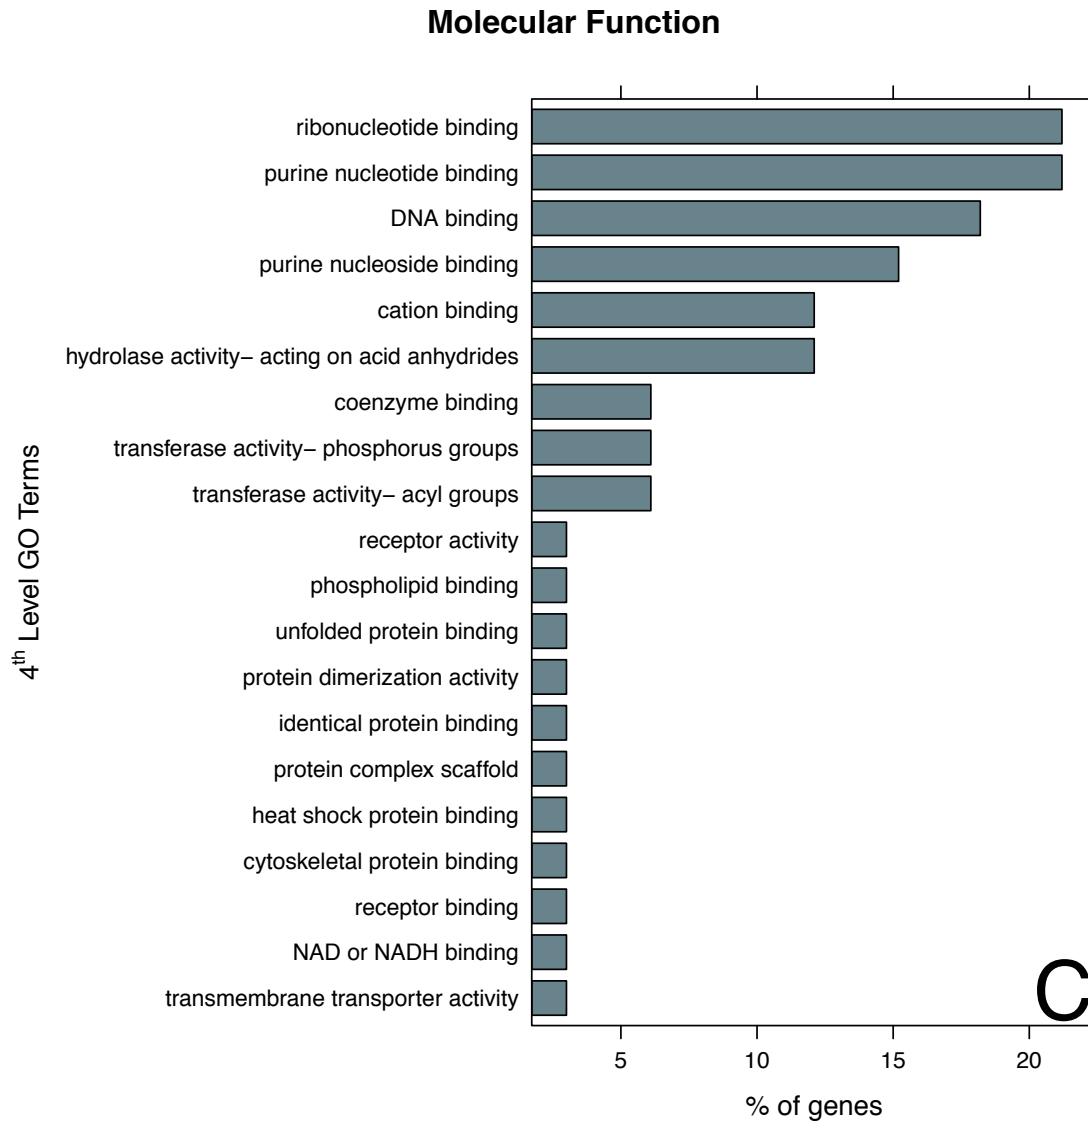

**Figure S8** 4<sup>th</sup> level GO term distribution for decreased rate genes. The top 20 most significant GO terms of each of the three ontologies, (a), (b), and (c).
