# Supplementary material
Source: HighWire-hosted journal article supplement (https://www.g3journal.org/content/suppl/2013/03/06/g3.113.005637)
Supplement: TableS1.pdf [file TableS1.pdf]

**Table S1 Accelerated genes and their gene products.**

29 genes were shown to be evolving at an accelerated rate. Of these, four could be annotated. The *Enallagma* ORF, associated gene, its gene product, and GO ID's are shown.

| ORF         | Gene  | Gene Product                                | Associated GO ID's                                                                                 |
|-------------|-------|---------------------------------------------|----------------------------------------------------------------------------------------------------|
| contig12757 | Nol10 | Nucleolar Protein 10                        | GO:0005730                                                                                         |
| contig13640 | Art7  | Protein arginine N-methyltransferase 7      | GO:0005737 GO:0019918 GO:0035243                                                                   |
| contig12629 | Rrp45 | mRNA processing                             | GO:0000178 GO:0005730 GO:0005829 GO:0051252 GO:0004532 GO:0017091 GO:0006364 GO:0005515 GO:0043928 |
| contig03660 | Uba3  | Ubiquitin-like modifier activating enzyme 3 | GO:0016881 GO:0008641 GO:0005524 GO:0045116                                                        |
